# Supplementary material for: Estrogen receptor beta expression in triple negative breast cancers is not associated with recurrence or survival
Source: BMC Cancer. 2023 May 19;23:459. doi: 10.1186/s12885-023-10795-5 (PMC10197848; doi:10.1186/s12885-023-10795-5)
Supplement: Supplementary file 5 — Additional file 5: Supplementary Table 1. Genes known to be specifically up or downregulated in ESR2 overexpressing MCF7 breast cancer cell lines. [file 12885_2023_10795_MOESM5_ESM.xlsx]

## Sheet: Sheet1
ESR2 overexpressing MCF7 cells
Upregulated (107)	Entrez ID	logFC	FDR
SNORD45C	692085	3.89	0.0337
SLC16A6	9120	2.99	0
SNORA5A	654319	2.86	0.0224
S100A7A	338324	2.54	0
KISS1	3814	2.51	0
CCNA1	8900	2.45	0
PRDM6	93166	2.36	0
SYT13	57586	2.33	0
NOX3	50508	2.31	0
SCG2	7857	2.17	0
TIMP4	7079	2.08	0
FN1	2335	2.03	0
XKRX	402415	1.91	0
ZNF488	118738	1.71	0
ASNS	440	1.69	0
MORC4	79710	1.67	0
MIR503HG	84848	1.67	0
REEP1	65055	1.66	0
SLC43A1	8501	1.63	0
TMEM254-AS1	219347	1.61	0
ATP6V1B1	525	1.59	0
ARHGAP27P2	440461	1.59	0
ADD3	120	1.58	0
ADGRB2	576	1.56	0
EP300-AS1	101927279	1.56	0
HOXC13-AS	100874366	1.55	0
PKMYT1	9088	1.53	0
METTL7B	196410	1.51	0
AZGP1	563	1.51	0
ARMCX3	51566	1.5	0
MIR924HG	647946	1.49	0
UBE2S	27338	1.47	0
HS3ST3B1	9953	1.46	0
LOC100507002	100507002	1.44	0
TMX2-CTNND1	100528016	1.44	0.0009
MELTF-AS1	100507057	1.41	0
ATP2A1-AS1	100289092	1.4	0
CD44	960	1.38	0
MFGE8	4240	1.38	0
ADM2	79924	1.37	0
CRLF1	9244	1.36	0
DOCK8	81704	1.34	0
AMIGO2	347902	1.34	0
PCK2	5106	1.33	0
ZNF503	84858	1.33	0
GLRA3	8001	1.31	0
LINC00337	148645	1.29	0
PTRH1	138428	1.29	0
LOC101927420	101927420	1.28	0
FAM129A	116496	1.27	0
ULBP1	80329	1.26	0
LOC101928433	101928433	1.26	0
PRSS53	339105	1.26	0
CHTF18	63922	1.26	0.0007
SHROOM3	57619	1.25	0
PPM1E	22843	1.24	0
LOC105374952	105374952	1.23	0.0001
LY6E-DT	100133669	1.2	0
PELI1	57162	1.19	0
HOXC6	3223	1.19	0
LOC101928000	101928000	1.19	0
44813	10801	1.18	0
RHEBL1	121268	1.18	0.0001
HSPA2	3306	1.17	0
FABP5	2171	1.17	0.0328
FAM72A	729533	1.16	0
ARHGAP33	115703	1.16	0
ACSM3	6296	1.16	0
MND1	84057	1.15	0
SCNN1D	6339	1.15	0.0113
AURKB	9212	1.14	0
CDKN2D	1032	1.14	0
F12	2161	1.13	0.0029
GULP1	51454	1.12	0
KRT16	3868	1.12	0
MXD1	4084	1.11	0
LINC00997	401321	1.1	0
SLC36A4	120103	1.1	0
TEDC1	283643	1.1	0.0158
SLC22A5	6584	1.09	0
MFSD13A	79847	1.09	0
SRM	6723	1.08	0
H1FX	8971	1.08	0
ADNP-AS1	101927631	1.08	0.0002
LOC728715	728715	1.08	0.0006
TK1	7083	1.07	0
DCUN1D3	123879	1.07	0
TUBB2A	7280	1.07	0
BLM	641	1.06	0
RAD51AP1	10635	1.06	0
REXO5	81691	1.05	0
MAGEA1	4100	1.05	0
E2F1	1869	1.04	0
NUDT1	4521	1.04	0
DDIT3	1649	1.04	0
AGA	175	1.03	0
PCDHA13	56136	1.03	0
H2AFX	3014	1.03	0
HIST2H2AC	8338	1.03	0.0287
CDT1	81620	1.02	0
FBXO5	26271	1.01	0
E2F7	144455	1.01	0
PSMC3IP	29893	1.01	0
GJB3	2707	1.01	0
SYCE2	256126	1.01	0
EXOSC10-AS1	105376736	1.01	0.0031
ATAD2	29028	1	0
Downregulated (138)	Entrez ID	logFC	FDR
MIR4756	100616225	-4.25	0.0128
C1orf116	79098	-3.49	0
HCAR2	338442	-3.37	0
STON1	11037	-3.21	0
ABCA1	19	-2.54	0
ANKRD35	148741	-2.21	0
ASB9	140462	-2.16	0
ACOXL	55289	-2.12	0
GPR161	23432	-2.12	0
SELENBP1	8991	-2.12	0
FAM149A	25854	-2.01	0
DTX4	23220	-1.91	0
SNORD19	692089	-1.89	0.0246
GYG2	8908	-1.89	0
PRICKLE2-AS1	100652759	-1.78	0
TARP	445347	-1.77	0
TRAF5	7188	-1.7	0
MARVELD1	83742	-1.67	0
IFIT1	3434	-1.66	0
INAVA	55765	-1.66	0
XAF1	54739	-1.65	0
CFL2	1073	-1.65	0
PRRT2	112476	-1.58	0
TRIM34	53840	-1.57	0
BATF2	116071	-1.55	0
OR7E91P	79315	-1.54	0
CA5B	11238	-1.53	0
UBE2L6	9246	-1.52	0
RIPOR3	140876	-1.48	0
PIK3IP1	113791	-1.47	0
RARRES3	5920	-1.47	0
SGSM1	129049	-1.46	0
CDH3	1001	-1.45	0
NDRG2	57447	-1.42	0
FAM92A	137392	-1.41	0
PARP14	54625	-1.4	0
NYNRIN	57523	-1.4	0
UGT1A1	54658	-1.4	0
IFIT2	3433	-1.4	0
THRA	7067	-1.37	0
TRERF1	55809	-1.37	0
HBEGF	1839	-1.37	0
OAS2	4939	-1.37	0
DTX3L	151636	-1.35	0
SHISA9	729993	-1.35	0
NEK6	10783	-1.33	0
CERS4	79603	-1.33	0
LOC100129034	100129034	-1.32	0
ACADSB	36	-1.32	0
PLEKHH2	130271	-1.31	0
ANKS6	203286	-1.31	0
ABCC4	10257	-1.3	0
OAS1	4938	-1.29	0
TIMP2	7077	-1.29	0
FBXO17	115290	-1.29	0
IFIT3	3437	-1.29	0
IZUMO4	113177	-1.28	0.0003
SLC52A3	113278	-1.28	0
PNRC1	10957	-1.26	0
GDF11	10220	-1.26	0
HIST2H2BF	440689	-1.26	0.0003
HIST1H3D	8351	-1.25	0.0003
EPHX2	2053	-1.25	0
ZNF467	168544	-1.24	0
GPR143	4935	-1.24	0
CYFIP2	26999	-1.24	0
LINC02593	100130417	-1.23	0
RFX5	5993	-1.22	0
GNE	10020	-1.22	0
MX2	4600	-1.21	0
DDX60L	91351	-1.2	0
ZNF792	126375	-1.19	0
ADGRE5	976	-1.19	0
HEYL	26508	-1.19	0
PARP9	83666	-1.18	0
AOX1	316	-1.18	0
C19orf66	55337	-1.18	0
FBXO27	126433	-1.17	0
FZD4	8322	-1.17	0
QKI	9444	-1.17	0
PARP10	84875	-1.17	0.0167
LOC102724156	102724156	-1.17	0.0002
MTCL1	23255	-1.17	0
BISPR	105221694	-1.17	0.0011
HES2	54626	-1.17	0
ITGA5	3678	-1.16	0
HIVEP2	3097	-1.16	0
CYP2T1P	171523	-1.14	0
TMEM8B	51754	-1.13	0.0006
TBC1D8B	54885	-1.13	0
SNHG4	724102	-1.13	0
RAB6B	51560	-1.13	0
PYCARD-AS1	100652740	-1.13	0.0194
CRY2	1408	-1.13	0
CAMK1D	57118	-1.12	0
DDX60	55601	-1.12	0
USP2	9099	-1.12	0
FAM78A	286336	-1.12	0
MOV10	4343	-1.12	0
LIN7A	8825	-1.11	0
SP6	80320	-1.11	0
NEBL	10529	-1.11	0
PPP2R5B	5526	-1.09	0
ZFP36L2	678	-1.09	0
FN3K	64122	-1.09	0
CEACAM19	56971	-1.09	0.0006
VEGFB	7423	-1.09	0
HIST1H2BD	3017	-1.08	0
ADAM11	4185	-1.08	0
SAMD9	54809	-1.08	0
LCN2	3934	-1.08	0.0029
LOC400684	400684	-1.08	0.0379
LRRC3	81543	-1.08	0
OASL	8638	-1.08	0
ANKRD34B	340120	-1.07	0
SLIT2	9353	-1.07	0
PRICKLE4	29964	-1.07	0
IQCH-AS1	100506686	-1.07	0
KRT32	3882	-1.07	0
LINC00865	643529	-1.06	0
CYP2U1	113612	-1.06	0
C3orf52	79669	-1.06	0
EHD3	30845	-1.05	0
WDR66	144406	-1.05	0
DDX58	23586	-1.05	0
EFNB2	1948	-1.05	0
IRF2	3660	-1.04	0
TRIM21	6737	-1.04	0
HIST1H1C	3006	-1.04	0
GKAP1	80318	-1.03	0
FERMT2	10979	-1.02	0
KIAA1257	57501	-1.02	0
CASP9	842	-1.01	0
HOXA10	3206	-1.01	0
NKILA	105416157	-1	0
CYP2J2	1573	-1	0
OBSL1	23363	-1	0
NFATC2	4773	-1	0
